# Supplementary material for: On the supramolecular outcomes of fluorination of cyclohexane-5-spirohydantoin derivatives
Source: Royal Society of Chemistry journal article supplement (doi:10.1039/d0ce01841d), 2021-01-01
Supplement: d0ce01841d1.pdf [file d0ce01841d1.pdf]

## Electronic Supplementary Information

### **On the supramolecular outcomes of fluorination of cyclohexane-5-spirohydantoin derivatives**

Kristina Gak Simić,<sup>a</sup> Ivana Đorđević,<sup>b</sup> Anita Lazić,<sup>a</sup> Lidija Radovanović,<sup>a</sup> Marija Petković-Benazzouz,<sup>c</sup> Jelena Rogan,<sup>d</sup> Nemanja Trišović<sup>d</sup> and Goran Janjić <sup>\*b</sup>

<sup>a</sup>*Innovation Centre of the Faculty of Technology and Metallurgy, Karnegijeva 4, 11120 Belgrade, Serbia;*

<sup>b</sup>*University of Belgrade - Institute of Chemistry, Technology and Metallurgy, Department of Chemistry, Njegoševa 12, 11000 Belgrade, Serbia; E-mail: goran.janjic@ihm.bg.ac.rs;*

<sup>c</sup>*Faculty of Physics, University of Belgrade; Studentski trg 12, Belgrade, Serbia;*

<sup>d</sup>*Faculty of Technology and Metallurgy, University of Belgrade, Karnegijeva 4, 11120 Belgrade, Serbia.*

ESI1. Geometric parameters describing the studied compounds 1 and 2

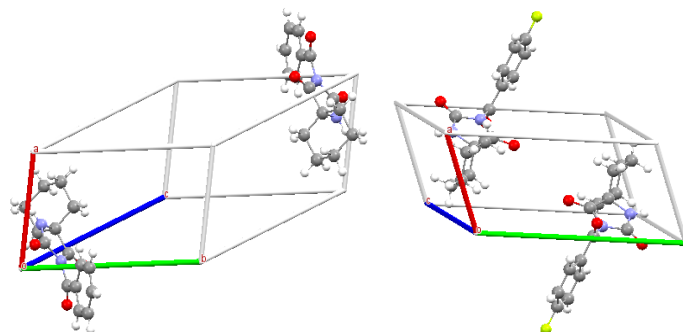

Fig. S1 Representation of the unit cells of **1** (left) and **2** (right).

**Table S1** Selected bond lengths (Å) and angles (°) in the investigated compounds.

|            | <b>1</b> | <b>2</b> |
|------------|----------|----------|
| N1–C2      | 1.330(2) | 1.330(2) |
| C2–N3      | 1.419(3) | 1.396(3) |
| N3–C4      | 1.398(2) | 1.377(3) |
| C4–C5      | 1.514(2) | 1.520(2) |
| C5–N1      | 1.452(2) | 1.452(3) |
| N3–C11     | 1.434(2) | 1.459(2) |
| C11–C12    | 1.488(3) | 1.454(2) |
| C2–O1      | 1.213(2) | 1.221(3) |
| C4–O2      | 1.201(2) | 1.205(3) |
| C11–O3     | 1.202(3) | 1.195(3) |
| C2–N1–C5   | 114.2(2) | 113.8(2) |
| O1–C2–N1   | 128.8(2) | 128.9(2) |
| O1–C2–N3   | 124.1(2) | 123.8(2) |
| N1–C2–N3   | 107.1(2) | 107.3(2) |
| C2–N3–C4   | 110.2(2) | 111.1(2) |
| O2–C4–N3   | 125.9(2) | 125.7(2) |
| O2–C4–C5   | 126.9(2) | 127.2(2) |
| N3–C4–C5   | 107.2(2) | 107.1(2) |
| N1–C5–C4   | 101.3(2) | 100.6(2) |
| N3–C11–C12 | 118.5(2) | 117.2(2) |
| N3–C11–O3  | 118.7(2) | 117.0(2) |
| C12–C11–O3 | 122.8(2) | 125.8(3) |

## ESI2. Hirshfeld surface analysis

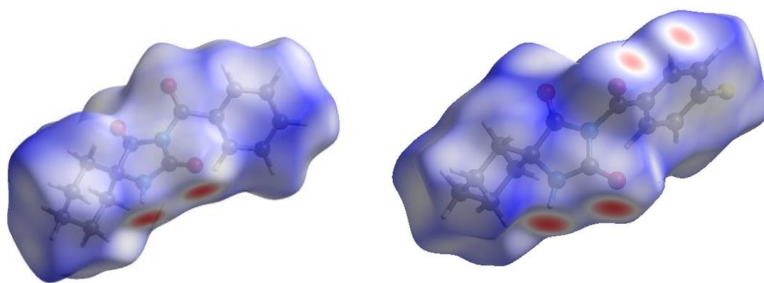

**Fig. S2** Views of Hirshfeld surfaces mapped over  $d_{\text{norm}}$  for **1** (left) and **2** (right).

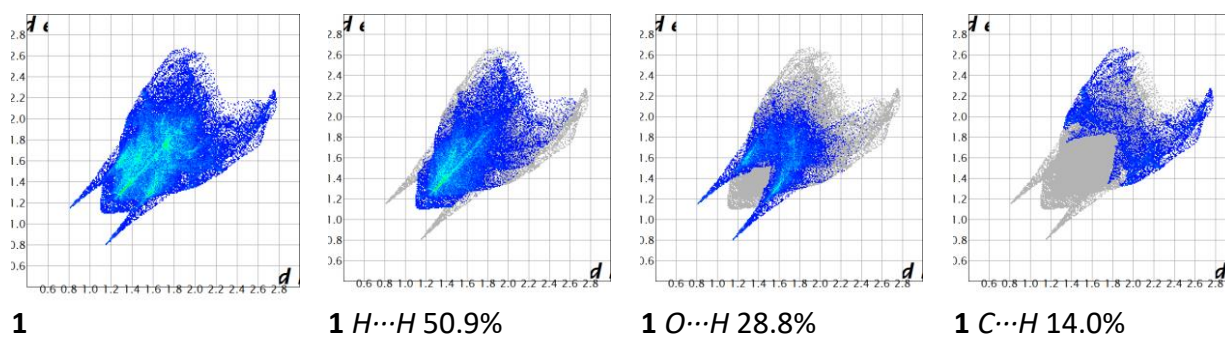

**Fig. S3** Fingerprint plot of **1** and plots decomposed into contributions from specific reciprocal intermolecular atom–atom contacts. For each plot, the grey shadow is an outline of the complete fingerprint plot.

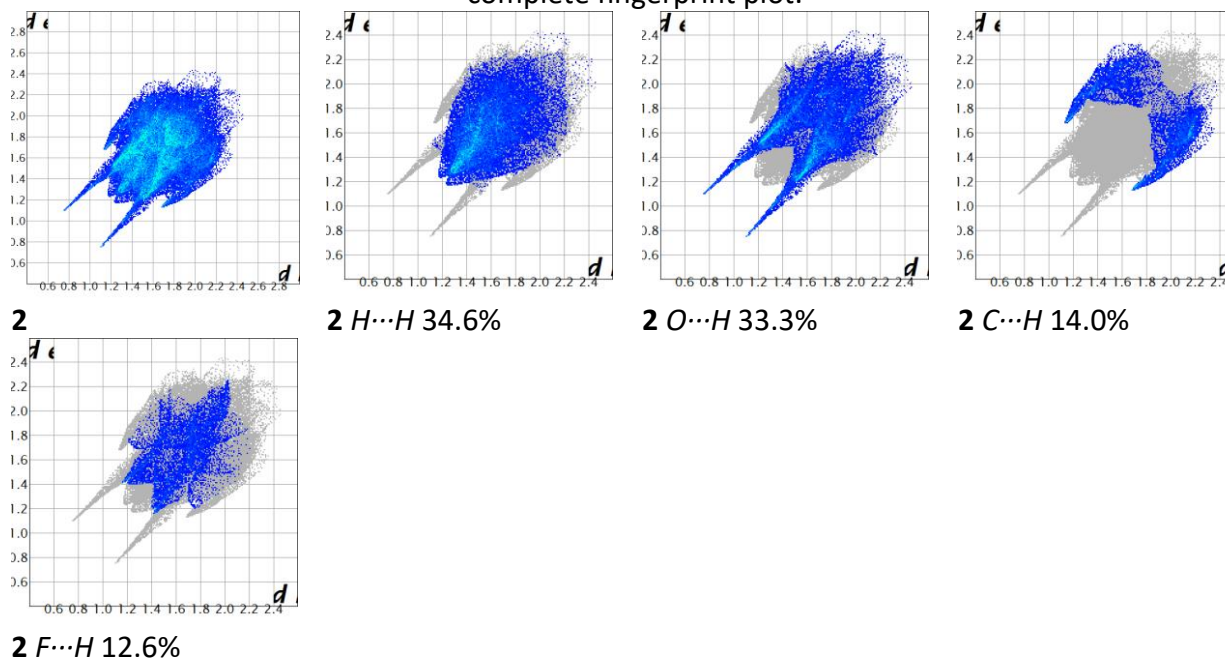

**Fig. S4** Fingerprint plot of **2** and plots decomposed into contributions from specific reciprocal intermolecular atom–atom contacts. For each plot, the grey shadow is an outline of the complete fingerprint plot.

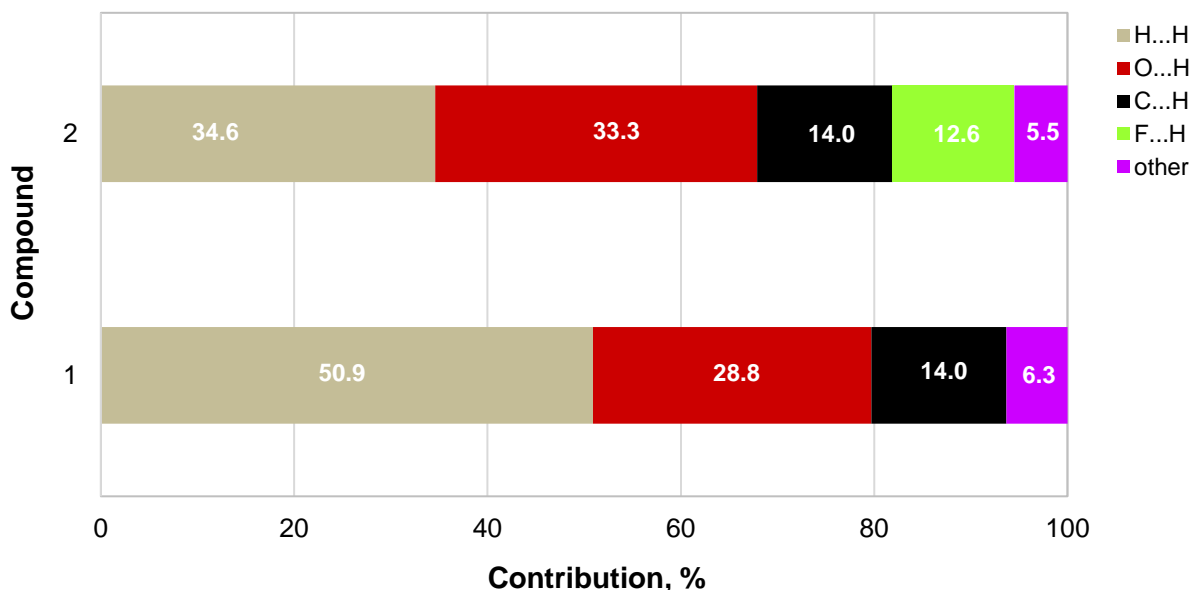

**Fig. S5** Relative contribution of intermolecular atom-atom contacts to the Hirshfeld surface area.

### ESI3. Energy frameworks

**Table S2** Lattice energies contributions of electronic, polarization, dispersion and repulsion energies using PIXEL (kcal/mol).

| Compound | $E_{\text{ele}}$ | $E_{\text{pol}}$ | $E_{\text{dis}}$ | $E_{\text{rep}}$ | $E_{\text{tot}}$ | Level of theory |
|----------|------------------|------------------|------------------|------------------|------------------|-----------------|
| <b>1</b> | -15.18           | -6.24            | -32.77           | 20.91            | -33.27           | MP2/6-31(d,p)   |
|          | -15.37           | -6.33            | -32.70           | 20.17            | -34.23           | B3LYP/6-31(d,p) |
| <b>2</b> | -17.76           | -6.36            | -30.66           | 20.53            | -34.25           | MP2/6-31(d,p)   |
|          | -17.97           | -6.41            | -30.59           | 20.00            | -34.99           | B3LYP/6-31(d,p) |

**Table S3** *Crystal Explorer* interaction energies (in kcal/mol) of the extracted dimeric motif for **1**, calculated at B3LYP/6-31G(d,p) level of theory.

| Motif     | $R^a$ | $E_{\text{ele}}$ | $E_{\text{pol}}$ | $E_{\text{dis}}$ | $E_{\text{rep}}$ | $E_{\text{tot}}$ | $E_{\text{tot}}^b$ |
|-----------|-------|------------------|------------------|------------------|------------------|------------------|--------------------|
| <b>H1</b> | 6.14  | -16.78           | -4.61            | -7.62            | 16.13            | -17.81           | -20.88             |
| <b>H2</b> | 4.83  | -2.01            | -1.15            | -11.35           | 4.09             | -10.33           | -12.31             |
| <b>H3</b> | 6.87  | -2.61            | -0.69            | -11.52           | 6.19             | -9.51            | -10.54             |
| <b>H4</b> | 8.24  | -3.92            | -1.36            | -4.49            | 2.65             | -7.41            | -7.99              |
| <b>H5</b> | 6.31  | -1.82            | -1.24            | -8.37            | 5.38             | -6.79            | -12.31             |
| <b>H6</b> | 12.19 | -0.10            | -0.14            | -2.37            | 1.08             | -1.58            | -1.58              |
| <b>H7</b> | 13.58 | -0.07            | -0.07            | -1.72            | 0.91             | -1.05            | -1.32              |
| <b>H8</b> | 13.57 | 0.31             | -0.07            | -1.58            | 0.67             | -0.72            | -0.8               |

<sup>a</sup> Distance between the centres of mass in Å.

<sup>b</sup> Interaction energies of dimeric motif calculated at TPSSH-D3/def2TZVP level of theory.

**Table S4** *Crystal Explorer* interaction energies (in kcal/mol) of the extracted dimeric motifs for **2**, calculated at B3LYP/6-31G(d,p) level of theory.

| Motif | $R^a$ | $E_{ele}$ | $E_{pol}$ | $E_{dis}$ | $E_{rep}$ | $E_{tot}$ | $E_{tot}^b$ |
|-------|-------|-----------|-----------|-----------|-----------|-----------|-------------|
| F1    | 7.24  | -21.13    | -5.62     | -6.05     | 19.79     | -19.55    | -21.12      |
| F2    | 5.24  | -3.13     | -0.86     | -11.07    | 5.11      | -10.40    | -11.73      |
| F7    | 8.01  | -2.87     | -0.98     | -6.88     | 2.70      | -8.08     | -9.09       |
| F3    | 8.53  | -2.89     | -0.76     | -7.65     | 4.02      | -7.82     | -9.03       |
| F6    | 6.00  | -0.62     | -0.91     | -7.60     | 2.87      | -6.19     | -7.31       |
| F9    | 8.76  | -4.35     | -0.91     | -2.84     | 4.71      | -4.85     | -5.04       |
| F8    | 7.24  | -0.33     | -0.29     | -4.54     | 2.63      | -2.92     | -2.74       |
| F5    | 14.07 | -0.29     | -0.05     | -1.63     | 0.91      | -1.20     | -1.31       |
| F4    | 13.77 | 0.24      | -0.07     | -2.27     | 1.10      | -1.10     | -1.27       |

<sup>a</sup> Distance between the centres of mass in Å.

<sup>b</sup> Interaction energies of dimeric motif calculated at TPSSH-D3/def2TZVP level of theory.

#### ESI4. Contacts of the individual cyclic fragments in the crystal structure of **1**

**Table S5** Analysis of intermolecular contacts of the cyclic fragments, which are present in **1**.

|             | Hydantoin | Cyclohexane      | Benzene          |
|-------------|-----------|------------------|------------------|
| Hydantoin   | H1, H8    | 2×H2, H7         | 2×H3             |
| Cyclohexane | 2×H2, H7  | H6               | H4, H5, H7, 2×H8 |
| Benzene     | 2×H3      | H4, H5, H7, 2×H8 | H3, H7           |

**Table S6** The results of calculations on the benzene–benzene model systems.

| Starting structure                                                                  | Optimized structure                                                                  |
|-------------------------------------------------------------------------------------|--------------------------------------------------------------------------------------|
| 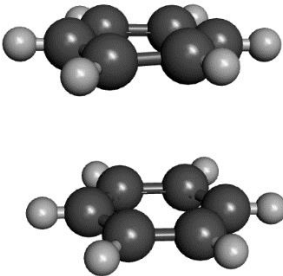   |    |
| Face-to-face geometry                                                               | Stacking geometry<br>–2.66 kcal/mol                                                  |
|   |   |
| T-shaped geometry                                                                   | T-shaped geometry<br>–2.86 kcal/mol                                                  |
|  |  |
| Displaced geometry<br>with large offset                                             | Stacking geometry<br>–2.66 kcal/mol                                                  |

**Table S7** The results of calculations on the cyclohexane–cyclohexane model systems.

| Starting structure                                                                  | Optimized structure                                                                  |
|-------------------------------------------------------------------------------------|--------------------------------------------------------------------------------------|
| 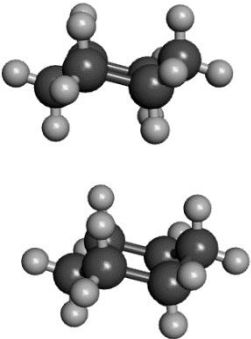   |    |
| Face-to-face geometry                                                               | Face-to-face geometry<br>–3.02 kcal/mol                                              |
|   |   |
| T-shaped geometry                                                                   | T-shape geometry<br>–2.34 kcal/mol                                                   |
|  |  |
| Displaced geometry<br>with large offset                                             | Tilted geometry<br>–2.71 kcal/mol                                                    |

**Table S8** The results of calculations on the hydantoin–hydantoin model systems.

| Starting structure                                                                  | Optimized structure                                                                  |
|-------------------------------------------------------------------------------------|--------------------------------------------------------------------------------------|
| 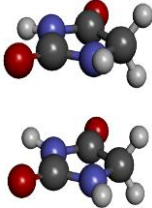   |    |
| Face-to-face geometry                                                               | Planar geometry<br>–16.15 kcal/mol                                                   |
|    |    |
| T-shape geometry 1                                                                  | T-shape geometry<br>–6.88 kcal/mol                                                   |
|   |   |
| T-shape geometry 2                                                                  | Planar geometry<br>–16.15 kcal/mol                                                   |
|  |  |
| Displaced geometry                                                                  | Planar geometry<br>–11.20 kcal/mol                                                   |
|  |  |
| Planar geometry                                                                     | Planar geometry<br>–17.83 kcal/mol                                                   |



**Table S9** The results of calculations on the cyclohexane–benzene model systems.

| Starting structure                                                                  | Optimized structure                                                                  |
|-------------------------------------------------------------------------------------|--------------------------------------------------------------------------------------|
| 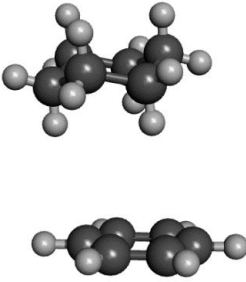   |    |
| Face-to-face geometry                                                               | Displaced geometry<br>–3.43 kcal/mol                                                 |
|    |    |
| T-shaped geometry                                                                   | Displaced geometry<br>–3.49 kcal/mol                                                 |
|  |  |
| Displaced geometry<br>with large offset                                             | Displaced geometry<br>–3.47 kcal/mol                                                 |

**Table S10** The results of calculations on the cyclohexane–hydantoin model systems.

| Starting structure                                                                  | Optimized structure                                                                  |
|-------------------------------------------------------------------------------------|--------------------------------------------------------------------------------------|
| 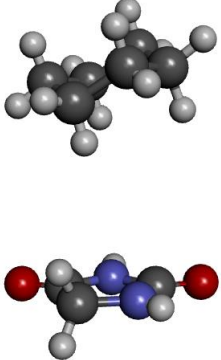   |    |
| Face-to-face geometry                                                               | Displaced geometry<br>–3.57 kcal/mol                                                 |
|   |   |
| T-shaped geometry 1                                                                 | Displaced geometry<br>–3.57 kcal/mol                                                 |
|  |  |
| T-shaped geometry 2                                                                 | Displaced geometry<br>–3.82 kcal/mol                                                 |

**Table S11** The results of calculations on the hydantoin–benzene model systems.

| Starting structure                                                                  | Optimized structure                                                                  |
|-------------------------------------------------------------------------------------|--------------------------------------------------------------------------------------|
| 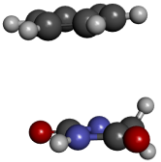   |    |
| Face-to-face geometry                                                               | T-shaped geometry<br>–5.25 kcal/mol                                                  |
|    |    |
| Displaced geometry                                                                  | T-shaped geometry<br>–5.37 kcal/mol                                                  |
|   |   |
| Planar geometry                                                                     | T-shaped geometry<br>–6.36 kcal/mol                                                  |
|  |  |
| T-shaped geometry                                                                   | T-shaped geometry<br>–5.71 kcal/mol                                                  |
|  |  |
| T-shaped geometry                                                                   | T-shaped geometry<br>–6.36 kcal/mol                                                  |

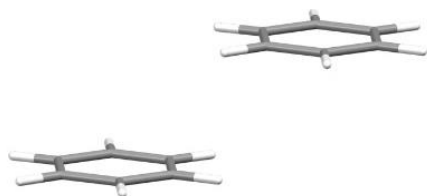

**Fig. S6** The most stable parallel geometry of the benzene dimer without overlap of the rings, corresponding to parallel interaction at a large offset with interaction energy of  $-1.98$  kcal/mol.<sup>S1</sup>

#### ESI5. Contacts of the individual cyclic fragments in the crystal structure of **2**

**Table S12** Analysis of intermolecular contacts of the cyclic fragments, which are present in **2**.

|                      | <b>Hydantoin</b> | <b>Cyclohexane</b>   | <b>Fluorobenzene</b> |
|----------------------|------------------|----------------------|----------------------|
| <b>Hydantoin</b>     | F1               | 2xF2, F6, 2xF7       | 2xF3, F6             |
| <b>Cyclohexane</b>   | 2xF2, F6, 2xF7   | F4                   | 2xF2, F5, 2xF7, 2xF8 |
| <b>Fluorobenzene</b> | 2xF3, F6         | 2xF2, F5, 2xF7, 2xF8 | F3, F6, F9           |

**Table S13** The results of calculations on the fluorobenzene–fluorobenzene model systems.

| Starting structure                                                                  | Optimized structure                                                                 | Starting Structure                                                                   | Optimized structure                                                                   |
|-------------------------------------------------------------------------------------|-------------------------------------------------------------------------------------|--------------------------------------------------------------------------------------|---------------------------------------------------------------------------------------|
| 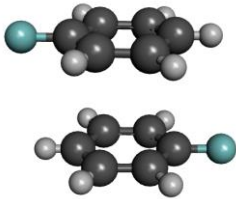   |    |    |    |
| Face-to-face geometry                                                               | Displaced geometry<br>–3.68 kcal/mol                                                | T-shaped geometry 4                                                                  | T-shaped geometry<br>–3.24 kcal/mol                                                   |
|   |   |   |   |
| T-shaped geometry 1                                                                 | T-shaped geometry<br>–2.83 kcal/mol                                                 | Displaced geometry                                                                   | Displaced geometry<br>–3.68 kcal/mol                                                  |
|  |  |  |  |
| T-shaped geometry 2                                                                 | T-shaped geometry<br>–2.80 kcal/mol                                                 | Displaced geometry with large offset 1                                               | Displaced geometry<br>–3.36 kcal/mol                                                  |
|  |  |  |  |
| T-shape geometry 2                                                                  | Displaced geometry<br>–3.57 kcal/mol                                                | Displaced geometry with large offset 2                                               | Displaced geometry<br>–3.41 kcal/mol                                                  |

**Table S14** The results of calculations on the cyclohexane–fluorobenzene model systems.

| Starting structure                                                                  | Optimized structure                                                                  |
|-------------------------------------------------------------------------------------|--------------------------------------------------------------------------------------|
| 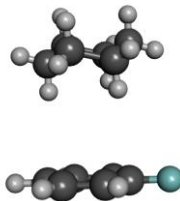   |    |
| Face-to-face geometry                                                               | Displaced geometry<br>–3.69 kcal/mol                                                 |
|    |    |
| T-shaped geometry 1                                                                 | Displaced geometry<br>–3.60 kcal/mol                                                 |
|   |   |
| T-shaped geometry 2                                                                 | Displaced geometry<br>–3.41 kcal/mol                                                 |
|  |  |
| Displaced geometry 1                                                                | Displaced geometry<br>with large offset<br>–2.13 kcal/mol                            |
|  |  |
| Displaced geometry 2                                                                | Displaced geometry<br>–3.28 kcal/mol                                                 |

**Table S15** The results of calculations on the hydantoin–fluorobenzene model systems.

| Starting structure                                                                  | Optimized structure                                                                 | Starting Structure                                                                   | Optimized structure                                                                   |
|-------------------------------------------------------------------------------------|-------------------------------------------------------------------------------------|--------------------------------------------------------------------------------------|---------------------------------------------------------------------------------------|
| 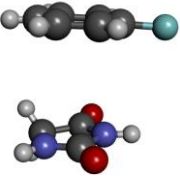   |    |    |    |
| Face-to-face geometry                                                               | Displaced geometry<br>–6.10 kcal/mol                                                | T-shaped geometry 4                                                                  | T-shaped geometry<br>–5.78 kcal/mol                                                   |
|    |    |    |    |
| T-shaped geometry 1                                                                 | T-shaped geometry<br>–5.78 kcal/mol                                                 | Displaced geometry 1                                                                 | T-shaped geometry<br>–5.94 kcal/mol                                                   |
|  |  |  |  |
| T-shaped geometry 2                                                                 | T-shaped geometry<br>–5.74 kcal/mol                                                 | Displaced geometry 2                                                                 | T-shaped geometry<br>–5.57 kcal/mol                                                   |
|  |  |  |  |
| T-shaped geometry 2                                                                 | T-shaped geometry<br>–5.74 kcal/mol                                                 | Planar geometry                                                                      | Planar geometry<br>–5.67 kcal/mol                                                     |

### ESI7. F...F interaction in the crystal structure of **2**

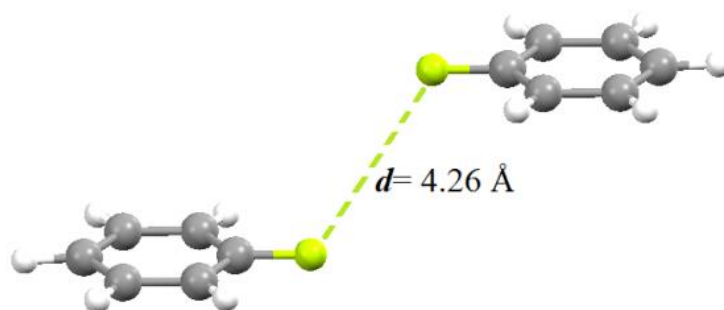

$$\Delta E = -0.02 \text{ kcal/mol}$$

**Fig. S7** Motif extracted from the crystal structure of **2** involving the F...F interaction with the associated interaction energy.

### References

- S1 D. B. Ninković, G. V. Janjić, D. Ž. Veljković, D. N. Sredojević and S. D. Zarić, What Are the preferred horizontal displacements in parallel aromatic–aromatic interactions? Significant interactions at large displacements, *ChemPhysChem*, 2011, **12**, 3511.
